# Supplementary material for: The Road to Cognitive Skill Acquisition: Psychometric Evaluation of the Competencies of Cognitive Therapy Scale
Source: Atypon-hosted journal article supplement (doi:10.1176/appi.psychotherapy.20210002), 2021-10-26
Supplement: appi.psychotherapy.20210002.ds001.pdf [file appi.psychotherapy.20210002.ds001.pdf]

---

## Online Appendix

### Competencies of Cognitive Therapy Scale Self Report (CCTS-SR) Item Descriptions

#### CCTS-SR Items

---

1. Rather than letting a challenge overwhelm me, I imagined how to break the challenge down, develop a plan, and worked on it step-by-step.
2. At times when my mood was at its lowest, I stepped back and recognized that my self evaluations were probably overly negative.
3. I was aware of some specific patterns in negative thinking that have tended to affect the way I interpret new situations.
4. I made an effort to evaluate my negative thoughts by considering just the facts.
5. I examined evidence from my past or present to more carefully consider whether my negative thoughts are accurate or not.
6. When my negative thoughts and emotions really bothered me, I had a specific action plan of things I could do to cope.
7. When I had a negative emotional reaction, I noticed my negative thinking, and took time to evaluate my negative thoughts.
8. When I evaluated a situation as negative, I tried to think of how someone else would view the situation, and I used that to help me decide how to re-evaluate the situation myself.
9. I questioned my original negative thoughts and made an effort to develop alternative conclusions.
10. I recognized that negative feelings are related to negative thoughts I have about myself.
11. When I found myself upset about something, I took note of what I was thinking and worked to develop a more balanced view.
12. I recognized that beliefs I formed on the basis of past events and relationships may no longer be applicable in the same way today.
13. I have been recognizing that inaccurate, negative thoughts and judgments help to maintain my depression.
14. I have been aware of specific patterns in my negative thinking-beliefs that tend to fuel my negative emotions.

- 
15. When I found myself worrying that something bad would happen, I reminded myself that the consequences might not be so terrible even if it did happen.
  16. When I made an effort to correct my negative thinking, I was confident that my mood would get better.
  17. When I was upset, I made an effort to engage in enjoyable activities that would be likely to improve my mood.
  18. When I have felt down, I engaged in activities that were enjoyable or gave me a sense of accomplishment (to try to help my mood).
  19. I have been confident that if I made an effort to be less pessimistic, my mood would improve.
  20. I caught myself thinking negatively, recognized the negative bias, and re-evaluated the situation.
  21. I often caught myself thinking in an irrational way and I actively worked to develop more rational views.
  22. When I had a task that I might have had trouble undertaking, I made an effort to break the task up into smaller parts.
  23. I took time to review specific thoughts I had during the most upsetting parts of my day.
  24. When I blamed myself for something bad that happened, I took time to consider other factors that may have been involved.
  25. I believed that working to more carefully evaluate my negative thoughts would probably help ease my depression.
  26. I noticed specific automatic thoughts as they occurred.
  27. Rather than avoiding a difficult decision, I weighed my options, developed a solution, and followed through with the decision I made.
  28. When I got upset, I took time to step back from a situation and consider that my negative thoughts might be inaccurate.
  29. When I had a tough interpersonal issue to address, I thought through how to be assertive in addressing the issue, tried to anticipate obstacles I might encounter, and initiated a conversation on the topic.

---

CCTS-SR 4-Factor, 3-Factor, and 2-Factor EFA Solution with Factor Loadings Using Data from an Online Panel

| 4-Factor Loadings |      |      |      |      | 3-Factor Loadings |      |      |      | 2-Factor Loadings |      |      |
|-------------------|------|------|------|------|-------------------|------|------|------|-------------------|------|------|
| Item              | F1   | F2   | F3   | F4   | Item              | F1   | F2   | F3   | Item              | F1   | F2   |
| 1.                | 0.62 |      |      |      | 1.                | 0.76 |      |      | 1.                | 0.54 |      |
| 2.                | 0.82 |      |      |      | 2.                | 0.79 |      |      | 2.                | 0.80 |      |
| 3.                | 0.64 |      |      |      | 3.                | 0.57 |      | 0.37 | 3.                | 0.90 |      |
| 4.                | 0.73 |      |      |      | 4.                | 0.83 |      |      | 4.                | 0.74 |      |
| 5.                | 0.72 |      |      |      | 5.                | 0.78 |      |      | 5.                | 0.83 |      |
| 6.                | 0.75 |      |      |      | 6.                | 0.74 |      |      | 6.                | 0.69 |      |
| 7.                | 0.85 |      |      |      | 7.                | 0.88 |      |      | 7.                | 0.82 |      |
| 8.                | 0.63 |      |      |      | 8.                | 0.66 |      |      | 8.                | 0.72 |      |
| 9.                | 0.79 |      |      |      | 9.                | 0.79 |      |      | 9.                | 0.78 |      |
| 10.               | 0.39 |      |      | 0.36 | 10.               |      |      | 0.46 | 10.               | 0.74 |      |
| 11.               | 0.49 |      |      |      | 11.               | 0.61 |      |      | 11.               | 0.66 |      |
| 12.               | 0.34 |      |      |      | 12.               | 0.36 |      |      | 12.               | 0.68 |      |
| 13.               |      |      |      | 0.52 | 13.               |      |      | 0.67 | 13.               | 0.70 |      |
| 14.               |      |      |      | 0.66 | 14.               |      |      | 0.83 | 14.               | 0.73 |      |
| 15.               |      |      | 0.51 |      | 15.               |      | 0.49 | 0.35 | 15.               | 0.43 | 0.39 |
| 16.               |      |      | 0.51 |      | 16.               |      | 0.67 |      | 16.               |      | 0.62 |
| 17.               |      |      | 0.90 |      | 17.               |      | 0.88 |      | 17.               |      | 0.86 |
| 18.               |      |      | 0.86 |      | 18.               |      | 0.86 |      | 18.               |      | 0.83 |
| 19.               |      |      | 0.72 |      | 19.               |      | 0.66 |      | 19.               |      | 0.63 |
| 20.               |      |      | 0.72 |      | 20.               | 0.34 | 0.39 |      | 20.               | 0.52 | 0.34 |
| 21.               |      | 0.65 |      |      | 21.               |      |      | 0.55 | 21.               | 0.64 |      |
| 22.               |      | 0.69 |      |      | 22.               |      |      |      | 22.               | 0.53 |      |
| 23.               |      | 0.70 |      |      | 23.               |      |      | 0.41 | 23.               | 0.68 |      |

---

CCTS-SR 4-Factor, 3-Factor, and 2-Factor EFA Solution with Factor Loadings Using Data from an Online Panel

| 4-Factor Loadings |      |      |    |    | 3-Factor Loadings |      |      |      | 2-Factor Loadings |      |      |
|-------------------|------|------|----|----|-------------------|------|------|------|-------------------|------|------|
| Item              | F1   | F2   | F3 | F4 | Item              | F1   | F2   | F3   | Item              | F1   | F2   |
| <b>24.</b>        |      | 0.47 |    |    | <b>24.</b>        | 0.39 |      | 0.30 | <b>24.</b>        | 0.69 |      |
| <b>25.</b>        |      | 0.49 |    |    | <b>25.</b>        |      |      | 0.52 | <b>25.</b>        | 0.73 |      |
| <b>26.</b>        |      | 0.57 |    |    | <b>26.</b>        |      |      | 0.47 | <b>26.</b>        | 0.69 |      |
| <b>27.</b>        |      | 0.65 |    |    | <b>27.</b>        | 0.39 | 0.36 |      | <b>27.</b>        | 0.48 | 0.33 |
| <b>28.</b>        | 0.31 | 0.43 |    |    | <b>28.</b>        | 0.47 |      |      | <b>28.</b>        | 0.62 |      |
| <b>29.</b>        |      | 0.48 |    |    | <b>29.</b>        | 0.43 |      |      | <b>29.</b>        | 0.59 |      |

<sup>1</sup>CCTS-SR item numbers correspond to item descriptions in table 1; F, Factor Model sub-factor, < 0.3 Cutoff Applied

CCTS-SR 4-Factor and 3-Factor Bi-factor Solution with Factor Loadings Using Data from an Online Panel

| 4-Factor Bi-factor Solution Loadings |      |      |      |     |     | 3-Factor Bi-factor Solution Loadings |      |      |      |     |
|--------------------------------------|------|------|------|-----|-----|--------------------------------------|------|------|------|-----|
| Item                                 | G    | BF1  | BF2  | BF3 | BF4 | Item                                 | G    | BF1  | BF2  | BF3 |
| 1.                                   | 0.75 |      |      |     |     | 1.                                   | 0.75 |      |      |     |
| 2.                                   | 0.78 |      |      |     |     | 2.                                   | 0.77 |      |      |     |
| 3.                                   | 0.70 |      |      |     |     | 3.                                   | 0.70 |      |      |     |
| 4.                                   | 0.79 |      |      |     |     | 4.                                   | 0.78 |      |      |     |
| 5.                                   | 0.78 |      |      |     |     | 5.                                   | 0.77 |      |      |     |
| 6.                                   | 0.76 |      |      |     |     | 6.                                   | 0.75 |      |      |     |
| 7.                                   | 0.82 |      |      |     |     | 7.                                   | 0.82 |      |      |     |
| 8.                                   | 0.70 |      |      |     |     | 8.                                   | 0.69 |      |      |     |
| 9.                                   | 0.83 |      |      |     |     | 9.                                   | 0.82 |      |      |     |
| 10.                                  | 0.61 |      |      |     |     | 10.                                  | 0.61 |      |      |     |
| 11.                                  | 0.76 |      |      |     |     | 11.                                  | 0.76 |      |      |     |
| 12.                                  | 0.71 |      |      |     |     | 12.                                  | 0.71 |      |      |     |
| 13.                                  | 0.63 |      | 0.43 |     |     | 13.                                  | 0.63 |      | 0.43 |     |
| 14.                                  | 0.66 |      | 0.59 |     |     | 14.                                  | 0.66 |      | 0.55 |     |
| 15.                                  | 0.71 |      |      |     |     | 15.                                  | 0.71 |      |      |     |
| 16.                                  | 0.70 | 0.44 |      |     |     | 16.                                  | 0.70 | 0.43 |      |     |
| 17.                                  | 0.65 | 0.59 |      |     |     | 17.                                  | 0.65 | 0.59 |      |     |
| 18.                                  | 0.64 | 0.56 |      |     |     | 18.                                  | 0.64 | 0.56 |      |     |
| 19.                                  | 0.68 | 0.44 |      |     |     | 19.                                  | 0.68 | 0.45 |      |     |
| 20.                                  | 0.77 |      |      |     |     | 20.                                  | 0.77 |      |      |     |
| 21.                                  | 0.59 |      |      |     |     | 21.                                  | 0.60 |      |      |     |
| 22.                                  | 0.68 |      |      |     |     | 22.                                  | 0.69 |      |      |     |
| 23.                                  | 0.76 |      |      |     |     | 23.                                  | 0.76 |      |      |     |

---

CCTS-SR 4-Factor and 3-Factor Bi-factor Solution with Factor Loadings Using Data from an Online Panel

| 4-Factor Bi-factor Solution Loadings |      |     |     |       | 3-Factor Bi-factor Solution Loadings |            |      |     |     |     |
|--------------------------------------|------|-----|-----|-------|--------------------------------------|------------|------|-----|-----|-----|
| Item                                 | G    | BF1 | BF2 | BF3   | BF4                                  | Item       | G    | BF1 | BF2 | BF3 |
| <b>24.</b>                           | 0.74 |     |     |       |                                      | <b>24.</b> | 0.74 |     |     |     |
| <b>25.</b>                           | 0.74 |     |     |       | 0.33                                 | <b>25.</b> | 0.74 |     |     |     |
| <b>26.</b>                           | 0.68 |     |     |       |                                      | <b>26.</b> | 0.68 |     |     |     |
| <b>27.</b>                           | 0.74 |     |     | -0.36 |                                      | <b>27.</b> | 0.75 |     |     |     |
| <b>28.</b>                           | 0.76 |     |     |       |                                      | <b>28.</b> | 0.76 |     |     |     |
| <b>29.</b>                           | 0.74 |     |     |       |                                      | <b>29.</b> | 0.74 |     |     |     |

<sup>1</sup>CCTS-SR item numbers correspond to item descriptions in table 1; G, General factor; BF, Bi-Factor Model sub-factor, < 0.3 Cutoff Applied

Associations between the CCTS-SR's general and specific factors and depression, emotional dysregulation, and cognitive reappraisal in a depressed subsample of an online panel (N=165)

| <b>Patient Scale</b> | CCTS-G | CCTS-BA | CCTS-CC | PROMIS-D | DERS  |
|----------------------|--------|---------|---------|----------|-------|
| PROMIS-D             | 0.06   | -0.08   | 0.38**  | -        |       |
| DERS                 | 0.08   | -0.10   | 0.38**  | 0.65**   | -     |
| ERQ-CR               | 0.55** | 0.53**  | -0.16   | -0.06    | -0.13 |

<sup>1</sup> CCTS-G, General factor from 2-factor bi-factor model; CCTS-BA, Behavioral Activation sub-factor from 2-factor bi-factor model; CCTS-CC, CBT Comprehension sub-factor from 2-factor bi-factor model; PROMIS-D, Emotional Distress Depression Short-form; ERQ-CR, Emotional Regulation Questionnaire Cognitive Reappraisal subscale; DERS, Difficulties in Emotion Regulation Scale

<sup>2</sup> \* $p < 0.01$ , \*\* $p < 0.001$

Cronbach's Alpha, Alpha if Item Deleted, and Total Item Correlations of the Competencies of Cognitive Therapy Scale Self Report, and Subfactors, using an online panel

| <b>CCTS-SR Full Scale</b> |                          |                        | $\alpha = 0.97$             |
|---------------------------|--------------------------|------------------------|-----------------------------|
| Item                      | $\alpha$ if Item Deleted | Total Item Correlation | Corrected Item Correlation* |
| 1.                        | 0.97                     | 0.75                   | 0.73                        |
| 2.                        | 0.97                     | 0.77                   | 0.75                        |
| 3.                        | 0.97                     | 0.70                   | 0.67                        |
| 4.                        | 0.97                     | 0.77                   | 0.75                        |
| 5.                        | 0.97                     | 0.77                   | 0.75                        |
| 6.                        | 0.97                     | 0.76                   | 0.74                        |
| 7.                        | 0.97                     | 0.81                   | 0.79                        |
| 8.                        | 0.97                     | 0.70                   | 0.67                        |
| 9.                        | 0.97                     | 0.82                   | 0.80                        |
| 10.                       | 0.97                     | 0.63                   | 0.60                        |
| 11.                       | 0.97                     | 0.76                   | 0.74                        |
| 12.                       | 0.97                     | 0.73                   | 0.71                        |
| 13.                       | 0.97                     | 0.66                   | 0.63                        |
| 14.                       | 0.97                     | 0.69                   | 0.67                        |
| 15.                       | 0.97                     | 0.75                   | 0.73                        |
| 16.                       | 0.97                     | 0.75                   | 0.73                        |
| 17.                       | 0.97                     | 0.71                   | 0.68                        |
| 18.                       | 0.97                     | 0.70                   | 0.67                        |
| 19.                       | 0.97                     | 0.73                   | 0.71                        |
| 20.                       | 0.97                     | 0.80                   | 0.78                        |
| 21.                       | 0.97                     | 0.61                   | 0.57                        |
| 22.                       | 0.97                     | 0.69                   | 0.68                        |
| 23.                       | 0.97                     | 0.76                   | 0.75                        |



Cronbach's Alpha, Alpha if Item Deleted, and Total Item Correlations of the Competencies of Cognitive Therapy Scale Self Report, and Subfactors, using an online panel

| <b>CCTS-SR Full Scale</b> |                       |                        |                             | $\alpha = 0.97$ |
|---------------------------|-----------------------|------------------------|-----------------------------|-----------------|
| Item                      | Alpha if Item Deleted | Total Item Correlation | Corrected Item Correlation* |                 |
| 24.                       | 0.97                  | 0.74                   | 0.72                        |                 |
| 25.                       | 0.97                  | 0.75                   | 0.73                        |                 |
| 26.                       | 0.97                  | 0.69                   | 0.66                        |                 |
| 27.                       | 0.97                  | 0.74                   | 0.72                        |                 |
| 28.                       | 0.97                  | 0.76                   | 0.74                        |                 |
| 29.                       | 0.97                  | 0.75                   | 0.72                        |                 |
| <b>BA Subfactor</b>       |                       |                        |                             |                 |
| Item                      | Alpha if Item Deleted | Total Item Correlation | Corrected Item Correlation* |                 |
| 16.                       | 0.88                  | 0.87                   | 0.77                        |                 |
| 17.                       | 0.86                  | 0.90                   | 0.82                        |                 |
| 18.                       | 0.87                  | 0.89                   | 0.79                        |                 |
| 19.                       | 0.89                  | 0.86                   | 0.76                        |                 |
| <b>CC Subfactor</b>       |                       |                        |                             |                 |
| Item                      | Alpha if Item Deleted | Total Item Correlation | Corrected Item Correlation* |                 |
| 13.                       | 0.72                  | 0.92                   | 0.68                        |                 |
| 14.                       | 0.63                  | 0.91                   | 0.68                        |                 |

\*Item correlation of specific item to remaining items within scale
